# Supplementary material for: Isolated terawatt attosecond hard X-ray pulse generated from single current spike
Source: PubMed Central journal article supplement (PMC5945633; doi:10.1038/s41598-018-25778-x), 2018-05-10
Supplement: 41598_2018_25778_MOESM1_ESM.pdf [file 41598_2018_25778_MOESM1_ESM.pdf]

Supplementary Information for

## **Isolated terawatt attosecond hard X-ray pulse generated from single current spike**

**Chi Hyun Shim,<sup>1</sup> Yong Woon Parc,<sup>2,\*</sup> Sandeep Kumar,<sup>3</sup> In Soo Ko,<sup>1</sup> and Dong Eon Kim<sup>4,5,\*</sup>**

<sup>1</sup>Department of Physics, Pohang University of Science and Technology, Pohang, 37673, Korea

<sup>2</sup>Pohang Accelerator Laboratory, Pohang University of Science and Technology, Pohang, 37673, Korea

<sup>3</sup>Department of Physics, Ulsan National Institute of Science and Technology, Ulsan, 44919, Korea

<sup>4</sup>Department of Physics, Center for Attosecond Science and Technology, Pohang University of Science and Technology, Pohang, 37673, Korea

<sup>5</sup>Max Planck POSTECH/Korea Res. Init., Pohang, 37673, Korea

\*Corresponding author: [young1@postech.ac.kr](mailto:young1@postech.ac.kr), [kimd@postech.ac.kr](mailto:kimd@postech.ac.kr)

Pohang Accelerator Laboratory X-ray Free-Electron Laser (PAL-XFEL) is currently operating facility which has two undulator lines: hard X-ray undulator line with 10 GeV electron beam and soft X-ray undulator line with 3.15 GeV electron beam. In our research, PAL-XFEL parameters for hard X-ray undulator line are used in simulation and listed in Table S1.

**Table S1.** Parameters for PAL-XFEL used in simulations.

| Parameter                                           | Value                |                          | Unit          |
|-----------------------------------------------------|----------------------|--------------------------|---------------|
|                                                     | SASE                 | E-SASE for current spike |               |
| <b><i>Electron beam</i></b>                         |                      |                          |               |
| Energy                                              | 10                   |                          | GeV           |
| Charge                                              | 200                  |                          | pC            |
| Peak current                                        | 3                    | 35                       | kA            |
| rms normalized slice emittance ( $\epsilon_{x,y}$ ) | 0.25                 |                          | $\mu\text{m}$ |
| rms slice energy spread                             | 250                  | 2917                     | keV           |
| <b><i>Wiggler</i></b>                               |                      |                          |               |
| Period                                              | 0.5                  |                          | m             |
| Length                                              | 1.0                  |                          | m             |
| <b><i>Chicane</i></b>                               |                      |                          |               |
| Bending magnet length ( $L_B$ in Fig. 1)            | 0.3                  |                          | m             |
| Drift length ( $L_{\text{DRIFT}}$ in Fig. 1)        | 2.5                  |                          | m             |
| <b><i>Undulator</i></b>                             |                      |                          |               |
| Period                                              | 26                   |                          | mm            |
| $a_w$                                               | 1.403                |                          |               |
| Length                                              | 4.94                 |                          | m             |
| <b><i>Radiation</i></b>                             |                      |                          |               |
| Wavelength (photon energy)                          | 0.1 (12.4)           |                          | nm (keV)      |
| FEL parameter ( $\rho$ )                            | $6.2 \times 10^{-4}$ | $1.4 \times 10^{-3}$     |               |
| Gain length ( $L_g$ )                               | 2.18                 | 0.94                     | m             |
| Saturation length ( $L_{sat}$ )                     | 40.39                | 19.03                    | m             |
| Saturation power ( $P_{sat}$ )                      | 23.18                | 639.1                    | GW            |

FEL parameter  $\rho$  is defined as follows<sup>42</sup>:

$$\rho = \left[ \left( \frac{I}{I_A} \right) \left( \frac{\lambda_w A_w}{2\pi\sigma_x} \right)^2 \left( \frac{1}{2\gamma_0} \right)^3 \right]^{1/3} \quad (S1)$$

where  $I$  is the peak current,  $I_A = 17.045$  kA is Alfvén current, and  $\lambda_w$  is the undulator period. For the helical undulator,  $A_w$  has same value as rms undulator parameter,  $a_w$ . For the planar undulator,  $A_w$  has the value of  $a_w[J_0(\xi) - J_1(\xi)]$  by using Bessel function where  $\xi = a_w^2/2(1 + a_w^2)$ .  $\sigma_x$  is the transverse electron beam size and the value is calculated by beta function and emittance as follows:  $\sigma_x = \sqrt{\beta\epsilon}$ .  $\gamma_0$  is Lorentz factor of the electron beam. 1-dimensional gain length  $L_{1d}$  can be estimated by FEL parameter  $\rho$  as shown in Eq. (S2).

$$L_{1d} = \lambda_w / 4\pi\sqrt{3}\rho \quad (S2)$$

By considering multidimensional effect, 3-dimensional gain length  $L_g$  can be estimated. There are scaling function between 1-dimensional FEL gain length and 3-dimensional FEL gain length as shown in Eq. (S3).

$$\frac{L_{1d}}{L_g} = F(\eta_d, \eta_\epsilon, \eta_\gamma) \quad (S3)$$

Such scaling function can be expressed as fitting formula based on the variational solution of the FEL dispersion relation by Ming Xie<sup>43</sup> as shown in Eq. (S4) with three parameters: Diffraction parameter  $\eta_d = \frac{L_{1d}}{L_r}$ , angular spread parameter  $\eta_\epsilon = \left( \frac{L_{1d}}{\beta} \right) \left( \frac{4\pi\epsilon}{\lambda} \right)$ , and energy spread parameter  $\eta_\gamma = 4\pi \left( \frac{L_{1d}}{\lambda_w} \right) \left( \frac{\sigma_e}{E_0} \right)$ .

$$\frac{L_{1d}}{L_g} = \frac{1}{1+\eta} \quad (S4)$$

The frequency detuning parameter is optimized to obtain the minimum FEL gain length. Rayleigh range in diffraction parameter is defined by using the resonant wavelength of FEL,  $\lambda$ :  $L_r = 4\pi\sigma_x^2/\lambda$ .  $\beta$  is beta function of the electron beam,  $\epsilon$  is transverse emittance,  $\sigma_e$  is rms electron beam energy spread, and  $E_0$  is electron beam energy. The gain length degradation factor  $\eta$  in Eq. (S4) is calculated by using fitting coefficients in Table S2 as shown in Eq. (S5).

$$\eta = a_1\eta_d^{a_2} + a_3\eta_\epsilon^{a_4} + a_5\eta_\gamma^{a_6} + a_7\eta_\epsilon^{a_8}\eta_\gamma^{a_9} + a_{10}\eta_d^{a_{11}}\eta_\gamma^{a_{12}} + a_{13}\eta_d^{a_{14}}\eta_\epsilon^{a_{15}} + a_{16}\eta_d^{a_{17}}\eta_\epsilon^{a_{18}}\eta_\gamma^{a_{19}} \quad (S5)$$

**Table S2. Coefficient for Ming Xie's fitting formula of scaling function**

|                |                |                 |                 |
|----------------|----------------|-----------------|-----------------|
| $a_1 = 0.45$   | $a_2 = 0.57$   | $a_3 = 0.55$    | $a_4 = 1.6$     |
| $a_5 = 3$      | $a_6 = 2$      | $a_7 = 0.35$    | $a_8 = 2.9$     |
| $a_9 = 2.4$    | $a_{10} = 51$  | $a_{11} = 0.95$ | $a_{12} = 3$    |
| $a_{13} = 5.4$ | $a_{14} = 0.7$ | $a_{15} = 1.9$  | $a_{16} = 1140$ |
| $a_{17} = 2.2$ | $a_{18} = 2.9$ | $a_{19} = 3.2$  |                 |

Saturation power  $P_{sat}$  are also presented in Eq. (S6).

$$P_{sat} \approx 1.6\rho \left(\frac{L_{1d}}{L_g}\right)^2 P_{beam} \quad (S6)$$

$P_{beam}$  is the power of the electron beam and is calculated by using the electron beam energy and peak current as follows:  $P_{beam}[\text{TW}] = E_0[\text{GeV}]I[\text{kA}]$

By increasing the peak current, FEL parameter value is increased as to  $1.4 \times 10^{-3}$  as shown in Table S1. Gain length is inverse proportional to FEL parameter as shown in Eq. (S2). Saturation power is proportional to  $I^{4/3}$  because the power of the electron beam is also proportional to the peak current of the electron beam.

Multidimensional effect can be also estimated by using Ming Xie's fitting formula.<sup>43</sup> In our case, only electron beam energy spread is increased when the current spike is generated by E-SASE section. When the peak current is increased from 3 kA to 35 kA, electron beam energy spread is also increased from 250 keV to 2917 keV as shown in Table S1, Supplementary Information. From Eq. (S2), 1-dimensional FEL gain length is decreased from 1.92 m to 0.85 m. 3-dimensional FEL gain length, which is calculated by Ming Xie's fitting formula, is decreased from 2.18 m to 0.94 m with Eq. (S4). Although 3-dimensional FEL gain length is slightly longer than 1-dimensional FEL gain length when the peak current is 35 kA, it is still shorter than both of FEL gain lengths when the peak current is 3 kA. Therefore, higher peak current of current spike is still preferable to generate TW as XFEL in spite of multidimensional effect from electron beam energy spread.
